# Supplementary material for: Multidimensional Analysis of PANoptosis-Related Molecule CASP8: Prognostic Significance, Immune Microenvironment Effect, and Therapeutic Implications in Hepatocellular Carcinoma
Source: Hindawi journal article supplement (doi:10.1155/2023/2406193), 2023-12-30
Supplement: f1 [file 2406193.f1.pdf]

# Figure S1

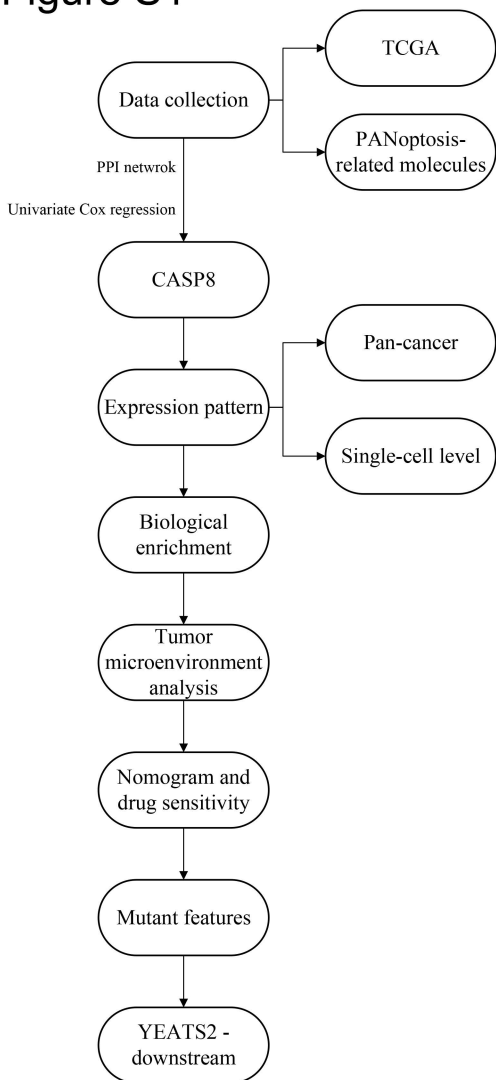

The flowchart of the whole study

Supplementary file 1. The univariate Cox regression analysis of the CASP8-related molecules

| id        | HR       | HR.95L   | HR.95H   | pvalue   |
|-----------|----------|----------|----------|----------|
| PHF12     | 1.321458 | 0.991126 | 1.761885 | 0.057534 |
| SCAF11    | 1.355121 | 1.05439  | 1.741625 | 0.017613 |
| THRAP3    | 1.418054 | 1.058571 | 1.899615 | 0.019204 |
| MBNL1     | 1.253631 | 0.975873 | 1.610448 | 0.076919 |
| HNRNPR    | 1.66335  | 1.286997 | 2.149757 | 0.000101 |
| TBL1XR1   | 1.910065 | 1.445046 | 2.524728 | 5.46E-06 |
| METAP1    | 1.440837 | 1.117538 | 1.857664 | 0.004845 |
| GEMIN5    | 1.679191 | 1.264444 | 2.229978 | 0.000342 |
| MAML1     | 1.37219  | 1.081963 | 1.740267 | 0.009062 |
| RASA1     | 1.159432 | 0.946507 | 1.420255 | 0.153027 |
| DR1       | 1.820679 | 1.421766 | 2.331518 | 2.05E-06 |
| ZSCAN30   | 1.457455 | 1.088619 | 1.951258 | 0.011396 |
| SLMAP     | 1.353626 | 1.020667 | 1.795201 | 0.035555 |
| DMTF1     | 1.224337 | 0.969661 | 1.545901 | 0.088936 |
| FBXO11    | 1.204793 | 0.978237 | 1.48382  | 0.079613 |
| POLR2B    | 1.222191 | 1.00556  | 1.485491 | 0.043835 |
| RBM12     | 1.587988 | 1.218751 | 2.06909  | 0.000615 |
| ZSCAN32   | 1.330469 | 0.947687 | 1.867863 | 0.099035 |
| MAP4K3    | 1.30278  | 1.069518 | 1.586916 | 0.008598 |
| QRICH1    | 1.550003 | 1.127399 | 2.131018 | 0.006971 |
| DUSP11    | 1.824385 | 1.336525 | 2.490323 | 0.000152 |
| NUP98     | 1.44916  | 1.09139  | 1.924212 | 0.010333 |
| DDX6      | 1.298351 | 0.976872 | 1.725625 | 0.072058 |
| NEMP1     | 1.414475 | 1.175162 | 1.702522 | 0.000246 |
| YEATS2    | 1.808243 | 1.422191 | 2.299089 | 1.34E-06 |
| BPTF      | 1.311585 | 1.048656 | 1.640437 | 0.017493 |
| RSRC1     | 1.30975  | 1.042086 | 1.646165 | 0.020701 |
| PIK3CA    | 1.44318  | 1.046149 | 1.990892 | 0.02543  |
| SAP130    | 1.530471 | 1.177055 | 1.990002 | 0.001489 |
| PRMT3     | 1.705663 | 1.316367 | 2.210087 | 5.36E-05 |
| REV1      | 1.210014 | 0.939247 | 1.558838 | 0.140211 |
| PHC3      | 1.200747 | 0.920227 | 1.566781 | 0.177793 |
| KIDINS220 | 1.283952 | 1.018288 | 1.618926 | 0.034585 |
| HAUS2     | 1.544902 | 1.170091 | 2.039775 | 0.002156 |
| SLC35F5   | 1.217535 | 0.942236 | 1.57327  | 0.13232  |
| HNRNPK    | 1.755325 | 1.249218 | 2.466474 | 0.001186 |
| SRSF1     | 1.566425 | 1.147962 | 2.137429 | 0.004653 |
| COPB2     | 1.639603 | 1.222682 | 2.198689 | 0.000957 |
| NIPA2     | 1.207542 | 0.967517 | 1.507113 | 0.095335 |
| RBBP4     | 1.373178 | 1.123828 | 1.677852 | 0.001924 |
| XPO1      | 1.77564  | 1.321843 | 2.385227 | 0.000137 |
| CLASP1    | 1.221689 | 0.9269   | 1.610232 | 0.155263 |
| REST      | 1.450128 | 1.105188 | 1.902729 | 0.007327 |
| HPS3      | 1.204767 | 1.019522 | 1.423672 | 0.028747 |
| ZC3H7A    | 1.236265 | 0.948614 | 1.61114  | 0.116515 |
| ANAPC1    | 1.906623 | 1.363442 | 2.666203 | 0.000162 |
| SUPT7L    | 1.92309  | 1.401711 | 2.6384   | 5.06E-05 |
| UVRAG     | 1.37094  | 0.997062 | 1.885014 | 0.052155 |
| NPAT      | 1.363855 | 1.043635 | 1.78233  | 0.02304  |
| TUT4      | 1.315981 | 1.061683 | 1.63119  | 0.0122   |
| CRLF3     | 1.398878 | 1.066777 | 1.834367 | 0.015206 |
| CAPRIN1   | 1.652529 | 1.274827 | 2.142135 | 0.000148 |
| NIPBL     | 1.4164   | 1.095437 | 1.831407 | 0.007926 |
| LASP1     | 1.259579 | 1.031815 | 1.53762  | 0.023346 |
| C5orf51   | 1.548444 | 1.210176 | 1.981265 | 0.000507 |
| HMGXB4    | 1.492145 | 1.171375 | 1.900754 | 0.001192 |

|          |          |          |          |          |
|----------|----------|----------|----------|----------|
| TANK     | 1.466834 | 1.118374 | 1.923865 | 0.005633 |
| ZFC3H1   | 1.48086  | 1.165513 | 1.88153  | 0.001311 |
| ZFR      | 1.422747 | 1.110036 | 1.823553 | 0.005364 |
| CCDC93   | 1.583353 | 1.236232 | 2.027941 | 0.000273 |
| CFLAR    | 1.107341 | 0.81175  | 1.510568 | 0.51986  |
| RFX5     | 1.189109 | 0.973689 | 1.452188 | 0.089414 |
| PHF21A   | 1.670476 | 1.315723 | 2.120879 | 2.52E-05 |
| SMC4     | 1.312809 | 1.13594  | 1.517218 | 0.000228 |
| SWAP70   | 1.351129 | 1.092589 | 1.670847 | 0.005484 |
| PIAS3    | 1.306159 | 1.073746 | 1.588878 | 0.007547 |
| MAPK1    | 1.337099 | 1.063722 | 1.680735 | 0.0128   |
| NUP107   | 1.704551 | 1.332689 | 2.180174 | 2.16E-05 |
| ACAP2    | 1.377994 | 1.063261 | 1.785889 | 0.015366 |
| ZMYM4    | 1.775362 | 1.389744 | 2.26798  | 4.35E-06 |
| ENOPH1   | 1.621558 | 1.25226  | 2.099762 | 0.000246 |
| ERBIN    | 1.145295 | 0.910783 | 1.44019  | 0.245831 |
| UBA3     | 1.609711 | 1.173165 | 2.208699 | 0.003184 |
| TAF1B    | 1.839302 | 1.412081 | 2.395777 | 6.22E-06 |
| UTP20    | 1.516161 | 1.169431 | 1.965694 | 0.001682 |
| ETAA1    | 1.329021 | 0.98804  | 1.787678 | 0.060051 |
| FOXJ3    | 1.724097 | 1.325775 | 2.242093 | 4.83E-05 |
| ZBTB11   | 1.538119 | 1.15327  | 2.051394 | 0.003383 |
| NRAS     | 1.719563 | 1.356103 | 2.180438 | 7.67E-06 |
| RNF4     | 1.431793 | 1.100658 | 1.862551 | 0.007481 |
| RAB3GAP1 | 1.253676 | 0.937925 | 1.675723 | 0.126738 |
| ZNF638   | 1.446081 | 1.027578 | 2.035028 | 0.034342 |
| DYNC1I2  | 1.331091 | 1.079575 | 1.641204 | 0.007439 |
| INPP4A   | 1.471647 | 1.130854 | 1.915141 | 0.004041 |
| CUL3     | 1.204463 | 0.956487 | 1.516728 | 0.113715 |
| CAB39    | 1.353529 | 1.024862 | 1.787599 | 0.032925 |
| ZMYM1    | 1.777509 | 1.362728 | 2.318538 | 2.21E-05 |
| INCENP   | 1.427561 | 1.186883 | 1.717043 | 0.000158 |
| SMARCC2  | 1.14669  | 0.957703 | 1.372971 | 0.136321 |
| NAB1     | 1.248158 | 1.023639 | 1.521922 | 0.02846  |
| SP1      | 1.338324 | 1.028194 | 1.741998 | 0.030259 |
| JRKL     | 1.374389 | 1.098984 | 1.718811 | 0.005316 |
| GCC2     | 1.297172 | 1.033453 | 1.628187 | 0.02485  |
| IWS1     | 1.343908 | 0.992968 | 1.818878 | 0.055586 |
| USP33    | 1.455078 | 1.123168 | 1.885072 | 0.004522 |
| PAK2     | 1.574273 | 1.194189 | 2.075328 | 0.001288 |
| CPSF6    | 1.89111  | 1.443538 | 2.477453 | 3.76E-06 |
| DCAF17   | 1.41302  | 1.065174 | 1.874459 | 0.016491 |
| C2CD3    | 1.454786 | 1.079191 | 1.961102 | 0.013889 |
| CREB1    | 1.763101 | 1.311433 | 2.370327 | 0.000173 |
| TWF1     | 1.425007 | 1.120067 | 1.812968 | 0.00394  |
| PRPF38B  | 1.459478 | 1.152193 | 1.848716 | 0.001722 |
| VPS8     | 1.597534 | 1.148907 | 2.22134  | 0.005348 |
| PCNP     | 1.659667 | 1.254972 | 2.194866 | 0.000382 |
| KANSL1   | 1.513257 | 1.149626 | 1.991905 | 0.003133 |
| KDM3B    | 1.290328 | 1.019686 | 1.632802 | 0.033814 |
| INO80D   | 1.506007 | 1.098094 | 2.06545  | 0.011067 |
| RASA2    | 1.314579 | 1.016172 | 1.700617 | 0.037335 |
| NOP58    | 1.606443 | 1.242465 | 2.077048 | 0.000299 |
| SNRNP20C | 1.398207 | 1.103984 | 1.770844 | 0.005426 |
| SLC4A1AP | 1.943652 | 1.361574 | 2.77457  | 0.000253 |
| DBR1     | 1.477173 | 1.139057 | 1.915656 | 0.003264 |
| SLTM     | 1.179107 | 0.867923 | 1.601863 | 0.291939 |
| GPATCH8  | 1.227946 | 0.987697 | 1.526633 | 0.064527 |

|          |          |          |          |          |
|----------|----------|----------|----------|----------|
| ARMC8    | 1.672852 | 1.217125 | 2.299217 | 0.00152  |
| TOPBP1   | 1.528746 | 1.234042 | 1.893828 | 0.000102 |
| SP3      | 1.408373 | 1.105422 | 1.794349 | 0.005588 |
| KPNB1    | 1.593686 | 1.254963 | 2.023832 | 0.000132 |
| PPHLN1   | 2.096555 | 1.490984 | 2.948082 | 2.07E-05 |
| RNF214   | 1.497323 | 1.12362  | 1.995316 | 0.005859 |
| NAA40    | 1.662079 | 1.327572 | 2.080872 | 9.37E-06 |
| ATP2C1   | 1.57209  | 1.224102 | 2.019005 | 0.000394 |
| TRIP12   | 1.478021 | 1.119301 | 1.951704 | 0.005877 |
| RELCH    | 1.498712 | 1.11813  | 2.008832 | 0.006789 |
| ZCCHC4   | 1.591115 | 1.132655 | 2.235144 | 0.0074   |
| RNF44    | 1.369224 | 1.108438 | 1.691366 | 0.003557 |
| ZNF207   | 1.93745  | 1.424408 | 2.635279 | 2.51E-05 |
| SETD5    | 1.376363 | 1.076209 | 1.76023  | 0.010924 |
| CNNM4    | 1.336739 | 1.071927 | 1.666973 | 0.009978 |
| USP24    | 1.696218 | 1.286661 | 2.236141 | 0.000179 |
| PNPT1    | 1.704096 | 1.268143 | 2.289918 | 0.000407 |
| CCNT2    | 1.260518 | 0.973961 | 1.631385 | 0.0785   |
| NR2C2    | 1.191069 | 0.956912 | 1.482525 | 0.117442 |
| HEATR5B  | 1.200583 | 0.931082 | 1.54809  | 0.158711 |
| MTREX    | 1.258148 | 0.973916 | 1.625331 | 0.078804 |
| CDC42SE2 | 1.398841 | 1.100092 | 1.778721 | 0.006178 |
| RAB10    | 1.680755 | 1.335402 | 2.11542  | 9.66E-06 |
| TCERG1   | 1.533004 | 1.188536 | 1.977308 | 0.001002 |
| NEPRO    | 1.637972 | 1.19756  | 2.24035  | 0.002013 |
| UBE2E1   | 1.350169 | 1.097199 | 1.661463 | 0.004564 |
| AGFG1    | 1.785495 | 1.383448 | 2.304382 | 8.45E-06 |
| PPP1R12A | 1.309934 | 1.028338 | 1.668643 | 0.028798 |
| SMPD4    | 1.457878 | 1.12867  | 1.883109 | 0.003891 |
| ADAM10   | 1.180526 | 0.934761 | 1.490906 | 0.16347  |
| C2orf49  | 1.571211 | 1.136617 | 2.171974 | 0.006236 |
| ACTL6A   | 1.44404  | 1.174301 | 1.77574  | 0.000496 |
| UBXN4    | 1.123558 | 0.8975   | 1.406556 | 0.309418 |
| AGPS     | 1.673338 | 1.298532 | 2.156328 | 6.92E-05 |
| SRSF10   | 1.959692 | 1.426079 | 2.692973 | 3.35E-05 |
| PAPOLG   | 1.674832 | 1.195948 | 2.34547  | 0.002688 |
| ERCC3    | 1.657044 | 1.229611 | 2.233058 | 0.000907 |
| TMEM131  | 1.332892 | 1.038695 | 1.710415 | 0.023925 |
| DHX15    | 1.451631 | 1.13028  | 1.864346 | 0.003509 |
| EIF4G2   | 1.399808 | 1.107637 | 1.769048 | 0.004865 |
| BTBD10   | 1.617897 | 1.250101 | 2.093904 | 0.000256 |
| TAOK1    | 1.359414 | 1.059567 | 1.744116 | 0.015733 |
| UEVLD    | 1.468141 | 1.112337 | 1.937757 | 0.006692 |
| ZNF621   | 1.264615 | 0.986078 | 1.62183  | 0.064383 |
| PDCD6IP  | 1.509095 | 1.124908 | 2.024492 | 0.006049 |
| NEDD1    | 1.540867 | 1.230055 | 1.930217 | 0.000169 |
| STAMBP   | 1.465152 | 1.067269 | 2.011366 | 0.018144 |
| PRPF40A  | 1.510554 | 1.156912 | 1.972298 | 0.002437 |
| STRN     | 1.516446 | 1.142055 | 2.013572 | 0.004    |
| STK4     | 1.566185 | 1.204712 | 2.036117 | 0.000805 |
| ATF2     | 1.434987 | 1.110231 | 1.854737 | 0.005803 |
| TP53BP1  | 1.332199 | 1.055061 | 1.682135 | 0.015936 |
| DENND5A  | 1.584682 | 1.23801  | 2.02843  | 0.000257 |
| NPC1     | 1.55342  | 1.253172 | 1.925605 | 5.84E-05 |
| TTF2     | 1.584466 | 1.257284 | 1.996791 | 9.62E-05 |
| TRIO     | 1.37871  | 1.108317 | 1.715071 | 0.003935 |
| CKAP5    | 1.674361 | 1.321572 | 2.121327 | 1.96E-05 |
| CWC22    | 1.476262 | 1.126592 | 1.934462 | 0.00474  |

|         |          |          |          |          |
|---------|----------|----------|----------|----------|
| STXBP3  | 1.463649 | 1.151733 | 1.86004  | 0.001838 |
| U2SURP  | 1.440999 | 1.131964 | 1.834403 | 0.003013 |
| ITSN2   | 1.309942 | 1.010808 | 1.6976   | 0.041227 |
| FAF2    | 1.630447 | 1.178346 | 2.256006 | 0.003173 |
| ADAM17  | 1.553654 | 1.225145 | 1.97025  | 0.000278 |
| QTRT2   | 1.585549 | 1.181533 | 2.127715 | 0.002129 |
| ACTR3   | 1.581835 | 1.221007 | 2.049293 | 0.000518 |
| ATM     | 1.22574  | 0.934162 | 1.608328 | 0.141947 |
| RBM12B  | 1.524999 | 1.160875 | 2.003337 | 0.002432 |
| ATXN2L  | 1.311782 | 1.05826  | 1.626038 | 0.013259 |
| DDX18   | 1.531054 | 1.152491 | 2.033966 | 0.003289 |
| COPB1   | 1.575361 | 1.213276 | 2.045505 | 0.000648 |
| PRKRA   | 1.468491 | 1.073154 | 2.009465 | 0.016343 |
| VRK2    | 1.511245 | 1.207443 | 1.891487 | 0.000311 |
| MFN1    | 1.68932  | 1.29141  | 2.209834 | 0.00013  |
| TOP1    | 1.471258 | 1.12405  | 1.925716 | 0.004932 |
| TBK1    | 1.606326 | 1.114023 | 2.316186 | 0.011141 |
| ZC3H15  | 1.722244 | 1.268653 | 2.33801  | 0.000491 |
| DNAJC13 | 1.552433 | 1.203133 | 2.003143 | 0.00072  |
| GTF3C3  | 1.830633 | 1.337995 | 2.504656 | 0.000157 |
| RPE     | 1.701545 | 1.285373 | 2.252465 | 0.000204 |
| MOB1A   | 1.435386 | 1.132201 | 1.81976  | 0.00283  |
| NCKAP1  | 1.407316 | 1.120066 | 1.768234 | 0.003353 |
| ACTR2   | 1.384545 | 1.097623 | 1.746469 | 0.006031 |
| BAZ2A   | 1.32742  | 1.079987 | 1.631541 | 0.007122 |
| CAPZA1  | 1.720945 | 1.323772 | 2.237283 | 5.01E-05 |
| SF3B1   | 1.395618 | 1.083017 | 1.798448 | 0.009985 |
| FUBP1   | 1.653749 | 1.321767 | 2.069113 | 1.08E-05 |
